# Supplementary material
Source: publisher figshare collection journal article supplement (https://frontiersin.figshare.com/ndownloader/files/28874634)
Supplement: Supplementary file 1 [file 28874634]

## Supplementary Figures

**Supplementary Figure 1.** Digitised map of Montserrat developed from participatory mapping exercises with stakeholders to understand the spatial context of marine activities and pressures.

**
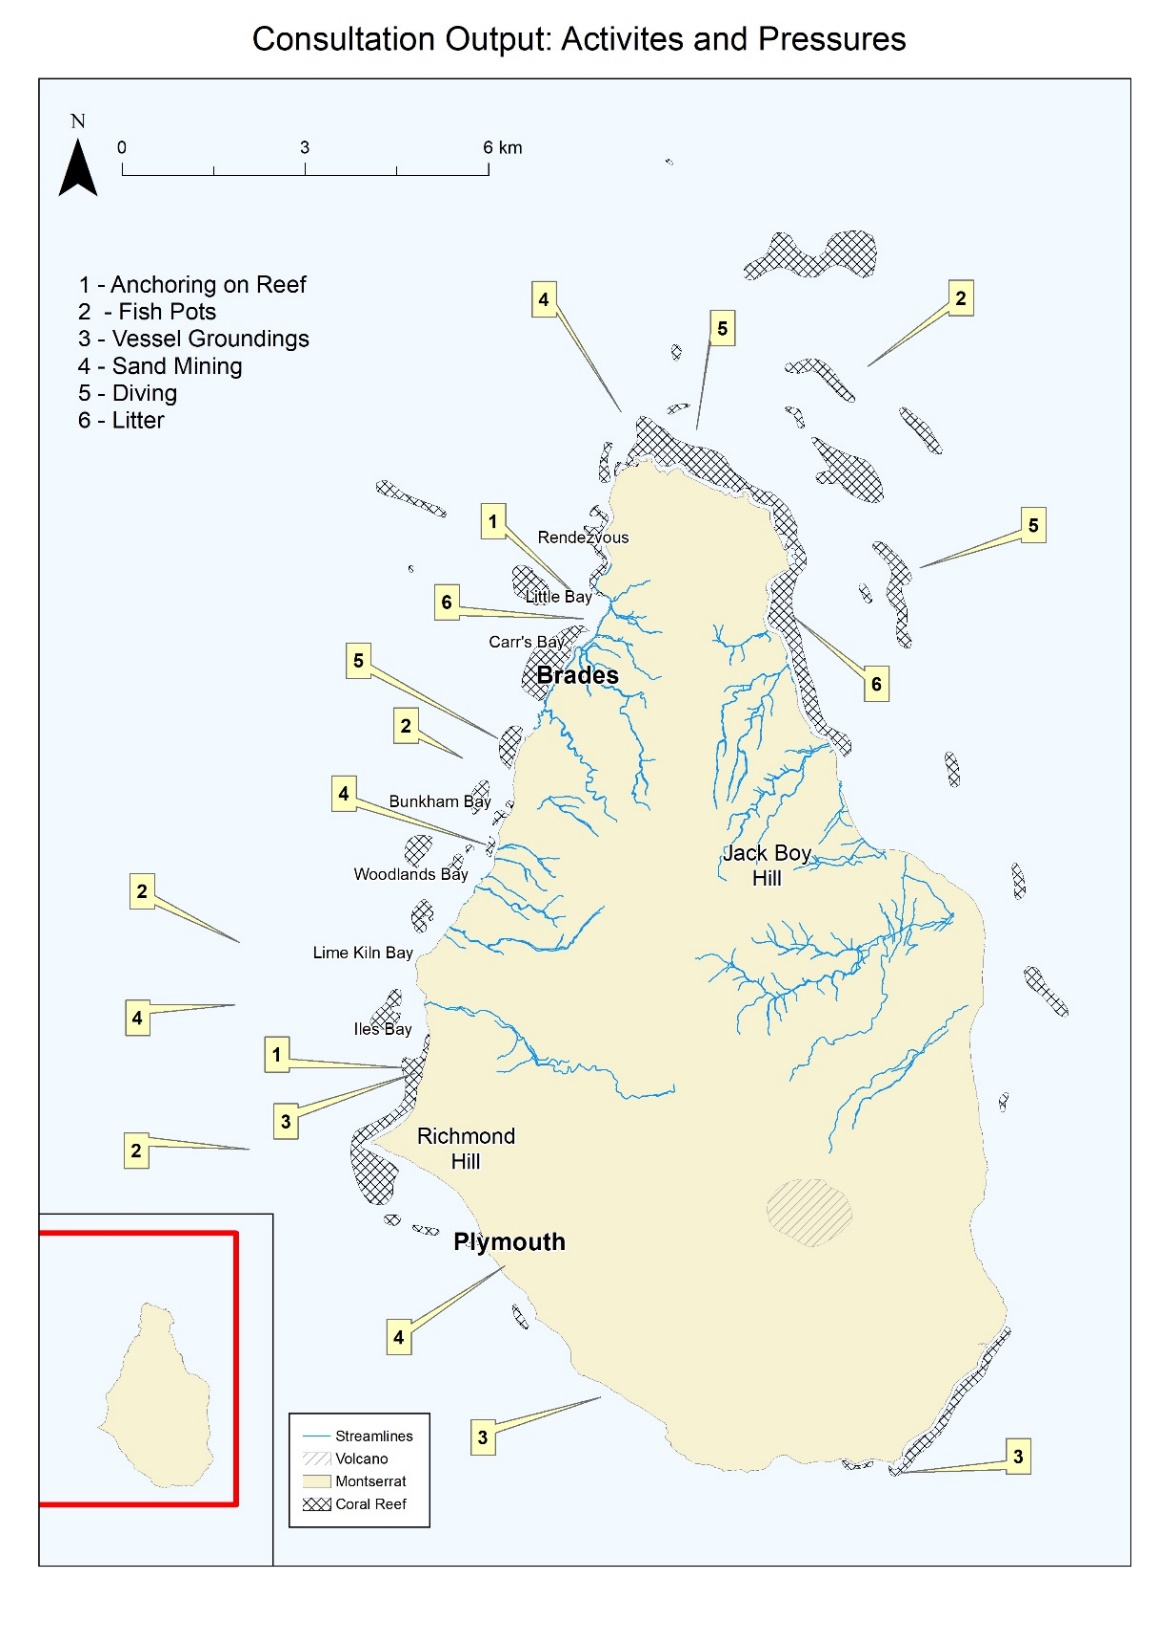
**
